# Supplementary material for: Surface modification of the TiO2nanoparticle surface enables fluorescence monitoring of aggregation and enhanced photoreactivity
Source: Royal Society of Chemistry journal article supplement (doi:10.1039/c2ib20166f), 2012-08-29
Supplement: c2ib20166f.pdf [file c2ib20166f.pdf]

**Electronic Supplementary Information**

**Surface modification of TiO<sub>2</sub> nanoparticle surface enables fluorescence monitoring of aggregation and enhanced photoreactivity**

Kara Kamps<sup>1</sup>, Rachael Leek<sup>1</sup>, Lanette Luebke<sup>1</sup>, Race Price<sup>1</sup>, Megan Nelson<sup>1</sup>, Stephanie Simonet<sup>1</sup>, David Joeseeph Eggert<sup>2</sup>, Tülay Aygan Ateşin<sup>2</sup>, and Eric Michael Bratsolias Brown<sup>1,\*</sup>

<sup>1</sup>Department of Biological Sciences, University of Wisconsin-Whitewater, Whitewater, WI 53190, USA.

<sup>2</sup>Department of Chemistry, University of Wisconsin-Whitewater, Whitewater, WI 53190, USA.

\*corresponding author; brown@uww.edu

### Portion of Gaussian input file for the geometry optimizations in gas phase.

```
%chk=DJE-003-0A.chk
%nproc=4
%mem=2Gb
#n becke3lyp/gen pseudo=cards scfcon=7 scfcyc=1000 minpop
nosymm int=finegrid vshift=1000 ginput opt=redundant freq

C1

-1 1
xyz coordinates

C H N O 0
6-31G**
****
Ti 0
LANL2DZ
****
S 0
LANL2DZ
****

Ti 0
LANL2DZ
S 0
LANL2DZ
```

### Portion of Gaussian input file for PCM corrections.

```
%chk=DJE-003-0A-pcm.chk
%nproc=4
%mem=2Gb
#n becke3lyp/6-311+G** scfcon=7 scfcyc=1000 minpop
nosymm int=finegrid vshift=1000 ginput
SCRF=(PCM,Solvent=water)

C1

-1 1
xyz coordinates
```

**Table S1.** Optimized geometries of the ground state structures of Ti dye complexes in gas phase.

| <i>A<sub>calc</sub></i> |              |           |           | <i>B<sub>calc</sub></i> |              |           |           |
|-------------------------|--------------|-----------|-----------|-------------------------|--------------|-----------|-----------|
| 65                      |              |           |           | 65                      |              |           |           |
| scf done:               | -2169.090880 |           |           | scf done:               | -2169.067510 |           |           |
| C                       | -10.596191   | 3.460860  | 10.183501 | Ti                      | -8.590691    | 1.115055  | 10.054808 |
| H                       | -11.282740   | 4.300033  | 10.204010 | O                       | -6.894763    | 1.216102  | 9.219401  |
| C                       | -10.224098   | 2.793172  | 11.344217 | H                       | -6.243873    | 0.973155  | 9.892663  |
| H                       | -10.624834   | 3.108667  | 12.303909 | O                       | -8.052595    | 1.527292  | 11.781608 |
| C                       | -9.328225    | 1.716610  | 11.277739 | H                       | -8.160558    | 2.474831  | 11.941880 |
| H                       | -9.033381    | 1.198250  | 12.186253 | O                       | -10.439075   | 1.432572  | 10.272945 |
| C                       | -8.813144    | 1.312619  | 10.051324 | H                       | -10.882937   | 1.695571  | 9.458170  |
| H                       | -8.112703    | 0.488850  | 9.968655  | O                       | -8.679083    | -0.725316 | 10.166338 |
| C                       | -9.188323    | 1.976669  | 8.874324  | H                       | -9.540943    | -0.964061 | 10.535983 |
| C                       | -10.081206   | 3.059270  | 8.941320  | O                       | -8.427184    | 3.512392  | 9.852279  |
| C                       | -10.484895   | 3.795773  | 7.718281  | C                       | -8.035734    | 4.179043  | 8.878672  |
| O                       | -11.303027   | 4.741084  | 7.839672  | C                       | -7.502984    | 5.545418  | 9.160054  |
| C                       | -8.625205    | 1.527983  | 7.572818  | C                       | -7.480560    | 6.018273  | 10.478439 |
| O                       | -7.815462    | 0.577127  | 7.590959  | H                       | -7.862108    | 5.369505  | 11.258520 |
| Ti                      | -6.204240    | -0.086786 | 6.015398  | C                       | -6.978565    | 7.284501  | 10.760676 |
| O                       | -7.143470    | -1.705994 | 6.294556  | H                       | -6.963592    | 7.643548  | 11.786217 |
| H                       | -7.895430    | -1.647116 | 6.895259  | C                       | -6.492319    | 8.097170  | 9.727516  |
| O                       | -4.975183    | -0.418908 | 7.391376  | H                       | -6.099232    | 9.085201  | 9.950681  |

|                              |            |           |           |                              |            |           |           |
|------------------------------|------------|-----------|-----------|------------------------------|------------|-----------|-----------|
| H                            | -5.060490  | -1.342871 | 7.659898  | C                            | -6.513748  | 7.637260  | 8.416110  |
| O                            | -5.395302  | -0.705597 | 4.471566  | H                            | -6.148980  | 8.244202  | 7.594823  |
| H                            | -5.678827  | -1.621466 | 4.336762  | C                            | -7.015969  | 6.359182  | 8.127424  |
| O                            | -5.709374  | 1.716529  | 6.105249  | C                            | -7.044343  | 5.892643  | 6.721946  |
| H                            | -5.046035  | 1.829581  | 6.799478  | O                            | -6.705951  | 6.690850  | 5.828372  |
| O                            | -7.854817  | 0.710751  | 4.918337  | C                            | -7.523018  | 4.513716  | 6.440459  |
| C                            | -8.600758  | 1.727949  | 5.118656  | C                            | -7.509124  | 4.042109  | 5.110739  |
| C                            | -9.050547  | 2.220060  | 6.369843  | N                            | -6.954095  | 4.811848  | 4.065475  |
| C                            | -9.928262  | 3.366606  | 6.439128  | C                            | -5.929837  | 4.412522  | 3.229029  |
| C                            | -10.263365 | 4.053016  | 5.244589  | C                            | -5.495960  | 5.318960  | 2.228575  |
| N                            | -11.078573 | 5.179241  | 5.316832  | C                            | -4.483407  | 4.978874  | 1.349361  |
| H                            | -11.486808 | 5.272253  | 6.259890  | C                            | -3.900606  | 3.715731  | 1.456142  |
| C                            | -11.173551 | 6.270399  | 4.478896  | C                            | -4.286744  | 2.800557  | 2.428190  |
| C                            | -12.289076 | 7.126190  | 4.662044  | C                            | -5.297720  | 3.148154  | 3.317463  |
| H                            | -13.030709 | 6.864880  | 5.410727  | H                            | -5.568083  | 2.463409  | 4.114122  |
| H                            | -13.306429 | 8.921634  | 4.030676  | H                            | -3.799781  | 1.833268  | 2.491786  |
| C                            | -11.488279 | 8.566561  | 2.934999  | S                            | -2.567697  | 3.265082  | 0.306067  |
| S                            | -11.676867 | 10.078956 | 1.945902  | O                            | -2.599663  | 4.184669  | -0.921333 |
| O                            | -13.130162 | 10.566934 | 1.999699  | O                            | -2.473515  | 1.737534  | 0.142693  |
| O                            | -10.706060 | 11.179072 | 2.909392  | O                            | -1.182121  | 3.714975  | 1.281392  |
| H                            | -10.359328 | 11.813451 | 2.256262  | H                            | -0.472172  | 3.125691  | 0.968197  |
| O                            | -10.934504 | 9.960524  | 0.602676  | H                            | -4.153719  | 5.663285  | 0.575359  |
| C                            | -10.372031 | 7.762248  | 2.728817  | H                            | -5.978466  | 6.288790  | 2.154458  |
| H                            | -9.637481  | 8.032283  | 1.977678  | H                            | -6.923040  | 5.801648  | 4.323412  |
| C                            | -10.212158 | 6.618265  | 3.499361  | O                            | -9.131639  | 1.614342  | 8.054543  |
| H                            | -9.321559  | 6.016532  | 3.373497  | C                            | -8.059336  | 3.711885  | 7.501942  |
| H                            | -10.150019 | 4.072675  | 3.094303  | C                            | -8.631031  | 2.418695  | 7.205186  |
| C                            | -9.841747  | 3.551786  | 3.988086  | C                            | -8.678003  | 2.033383  | 5.824270  |
| C                            | -9.060951  | 2.417959  | 3.906113  | C                            | -8.171306  | 2.808520  | 4.806580  |
| N                            | -8.553264  | 1.821357  | 2.772777  | N                            | -8.300501  | 2.412150  | 3.456763  |
| C                            | -8.817786  | 1.957615  | 1.429085  | C                            | -9.403442  | 1.880363  | 2.820636  |
| C                            | -9.975505  | 2.575528  | 0.905160  | C                            | -9.239308  | 1.421275  | 1.491137  |
| C                            | -10.177417 | 2.639665  | -0.468735 | C                            | -10.310382 | 0.920346  | 0.769976  |
| C                            | -9.225620  | 2.086574  | -1.316224 | C                            | -11.558727 | 0.868127  | 1.383877  |
| C                            | -8.076948  | 1.456614  | -0.838771 | C                            | -11.761240 | 1.305691  | 2.689157  |
| C                            | -7.877058  | 1.396938  | 0.528794  | C                            | -10.686880 | 1.808402  | 3.409337  |
| H                            | -6.984383  | 0.925215  | 0.929034  | S                            | -12.974932 | 0.240383  | 0.435202  |
| H                            | -7.352558  | 1.042628  | -1.531518 | O                            | -14.076957 | -0.294200 | 1.366296  |
| S                            | -9.506888  | 2.146003  | -3.111378 | H                            | -10.187248 | 0.560571  | -0.245603 |
| O                            | -10.548468 | 3.218301  | -3.455298 | O                            | -13.585946 | 1.764336  | -0.187516 |
| O                            | -8.177429  | 2.069263  | -3.882335 | H                            | -14.522631 | 1.581609  | -0.383262 |
| O                            | -10.264452 | 0.575621  | -3.315576 | O                            | -12.488363 | -0.591257 | -0.758829 |
| H                            | -10.154428 | 0.377583  | -4.263064 | H                            | -8.254707  | 1.460510  | 1.033248  |
| H                            | -11.063258 | 3.110007  | -0.881543 | H                            | -7.511752  | 2.598041  | 2.854251  |
| H                            | -10.739200 | 2.959509  | 1.567050  | H                            | -10.838561 | 2.156967  | 4.422561  |
| H                            | -7.875163  | 1.106899  | 3.057090  | H                            | -12.747643 | 1.245677  | 3.136216  |
| C                            | -12.448393 | 8.271305  | 3.900654  | H                            | -9.126465  | 1.069126  | 5.614378  |
| <b>C<sub>calcd</sub></b>     |            |           |           | <b>D<sub>calcd</sub></b>     |            |           |           |
| 65<br>scf done: -2169.063337 |            |           |           | 65<br>scf done: -2169.061708 |            |           |           |
| C                            | -7.641570  | -2.720516 | 4.554878  | Ti                           | -5.638346  | 1.577395  | 8.192757  |
| C                            | -6.888528  | -1.551693 | 4.589885  | O                            | -4.233644  | 2.785829  | 7.880396  |
| C                            | -7.556148  | -0.338128 | 4.497173  | H                            | -3.649889  | 2.418522  | 7.204232  |
| C                            | -8.968927  | -0.277073 | 4.368996  | O                            | -6.206264  | 2.704796  | 9.552567  |
| C                            | -9.687572  | -1.497196 | 4.312907  | H                            | -5.697307  | 3.524524  | 9.593116  |
| C                            | -9.028767  | -2.712931 | 4.408499  | O                            | -4.902111  | 0.173235  | 9.153174  |
| N                            | -9.625258  | 0.938947  | 4.220872  | H                            | -4.614276  | -0.511438 | 8.532714  |
| Ti                           | -11.448401 | 1.097902  | 2.695040  | O                            | -5.345162  | 0.687585  | 6.539958  |
| O                            | -12.359852 | -0.297868 | 3.533647  | H                            | -5.496070  | 1.105291  | 5.685851  |
| S                            | -6.773933  | -4.316122 | 4.639765  | O                            | -6.988911  | 2.887783  | 6.873824  |
| O                            | -6.588685  | -4.710035 | 2.937276  | C                            | -7.909132  | 2.601513  | 6.087400  |
| O                            | -10.218092 | 2.852699  | 2.359634  | C                            | -8.352343  | 3.646452  | 5.125749  |
| C                            | -9.680403  | 3.669029  | 3.154409  | C                            | -7.885519  | 4.960422  | 5.275680  |
| C                            | -9.293516  | 3.355385  | 4.495444  | H                            | -7.229757  | 5.178664  | 6.111549  |
| C                            | -8.816871  | 4.415724  | 5.352636  | C                            | -8.263258  | 5.943273  | 4.367060  |
| C                            | -8.689093  | 5.791055  | 4.894341  | H                            | -7.908559  | 6.962250  | 4.495181  |
| C                            | -8.995839  | 6.081882  | 3.489663  | C                            | -9.095340  | 5.622231  | 3.285064  |
| C                            | -9.455765  | 5.049002  | 2.647483  | H                            | -9.383339  | 6.392095  | 2.574330  |

|                              |            |           |           |                              |            |           |           |
|------------------------------|------------|-----------|-----------|------------------------------|------------|-----------|-----------|
| C                            | -9.229339  | 1.992951  | 4.960977  | C                            | -9.549455  | 4.318711  | 3.118600  |
| C                            | -8.743041  | 1.781485  | 6.306457  | H                            | -10.187626 | 4.037906  | 2.287715  |
| C                            | -8.408470  | 2.804524  | 7.158636  | C                            | -9.186038  | 3.325016  | 4.038435  |
| C                            | -8.403797  | 4.152364  | 6.659831  | C                            | -9.674984  | 1.940982  | 3.860947  |
| C                            | -9.750367  | 5.341327  | 1.306053  | O                            | -10.397486 | 1.660217  | 2.865967  |
| C                            | -9.574569  | 6.629443  | 0.814764  | C                            | -9.342903  | 0.962391  | 4.872074  |
| C                            | -9.116153  | 7.655803  | 1.655844  | C                            | -8.537634  | 1.284114  | 6.022156  |
| C                            | -8.832746  | 7.383430  | 2.987235  | C                            | -8.380169  | 0.368577  | 7.085446  |
| N                            | -8.002711  | 2.681780  | 8.490186  | N                            | -7.727028  | 0.657820  | 8.261459  |
| C                            | -8.311896  | 1.746903  | 9.458895  | C                            | -9.835743  | 0.559997  | 9.520652  |
| C                            | -7.645237  | 1.863010  | 10.702362 | C                            | -10.507064 | 0.407686  | 10.724402 |
| C                            | -7.924882  | 0.999653  | 11.747865 | C                            | -9.762554  | 0.197798  | 11.881900 |
| C                            | -8.874232  | 0.001485  | 11.547121 | C                            | -8.365411  | 0.154231  | 11.866982 |
| C                            | -9.549404  | -0.148765 | 10.341123 | C                            | -7.698164  | 0.307389  | 10.665169 |
| C                            | -9.269228  | 0.721066  | 9.294536  | C                            | -8.413165  | 0.510204  | 9.448245  |
| S                            | -9.271490  | -1.111108 | 12.931126 | H                            | -10.405409 | 0.745304  | 8.616270  |
| O                            | -8.161715  | -1.045214 | 13.987532 | H                            | -11.590031 | 0.445184  | 10.774793 |
| O                            | -7.973830  | 5.105948  | 7.495208  | H                            | -6.616811  | 0.255667  | 10.624678 |
| O                            | -8.287502  | 6.711763  | 5.663221  | H                            | -7.818260  | -0.021028 | 12.787241 |
| O                            | -10.673838 | -0.273882 | 13.572615 | S                            | -10.629944 | 0.021717  | 13.461166 |
| O                            | -9.806304  | -2.462552 | 12.427313 | O                            | -12.105891 | -0.327628 | 13.226185 |
| O                            | -12.528066 | 1.523405  | 1.233037  | O                            | -9.785347  | -0.782304 | 14.473388 |
| O                            | -12.334273 | 2.257177  | 3.933529  | O                            | -10.580209 | 1.664608  | 14.087779 |
| O                            | -10.303062 | 0.137603  | 1.587721  | H                            | -10.313603 | 1.526764  | 15.014328 |
| O                            | -5.364387  | -4.125711 | 5.214270  | H                            | -10.744908 | 0.147710  | 3.160630  |
| O                            | -7.701518  | -5.426502 | 5.176232  | O                            | -10.693628 | -0.673925 | 3.739702  |
| H                            | -11.223428 | -0.990782 | 13.937769 | C                            | -9.916438  | -0.324490 | 4.769183  |
| H                            | -7.414152  | 1.079663  | 12.701044 | C                            | -9.666112  | -1.290371 | 5.758439  |
| H                            | -6.900258  | 2.643234  | 10.832086 | C                            | -8.888830  | -0.987981 | 6.865139  |
| H                            | -10.283097 | -0.938502 | 10.220581 | N                            | -8.531831  | -1.924723 | 7.818549  |
| H                            | -9.817238  | 0.623691  | 8.367538  | C                            | -8.549886  | -3.311603 | 7.804144  |
| H                            | -8.687126  | 0.758194  | 6.650399  | C                            | -8.481361  | -3.962516 | 9.058759  |
| H                            | -7.563866  | 3.528659  | 8.829936  | C                            | -8.450356  | -5.344599 | 9.144420  |
| H                            | -8.017316  | 5.964015  | 6.936921  | C                            | -8.494725  | -6.081843 | 7.963603  |
| H                            | -8.481657  | 8.154631  | 3.664535  | C                            | -8.549002  | -5.481945 | 6.712154  |
| H                            | -8.985915  | 8.661641  | 1.266077  | C                            | -8.574966  | -4.094226 | 6.630265  |
| H                            | -9.798181  | 6.843401  | -0.227002 | S                            | -8.440010  | -7.899793 | 8.061773  |
| H                            | -10.117593 | 4.535204  | 0.680362  | O                            | -8.941887  | -8.514679 | 6.749621  |
| H                            | -13.353988 | 1.909421  | 1.552930  | O                            | -8.971622  | -8.396306 | 9.417950  |
| H                            | -12.150388 | 3.201336  | 3.968241  | O                            | -6.702663  | -8.121471 | 8.133120  |
| H                            | -10.657723 | 0.055884  | 0.692468  | H                            | -6.591558  | -8.953806 | 8.627255  |
| H                            | -12.899525 | 0.106866  | 4.228314  | H                            | -8.415880  | -5.847030 | 10.104797 |
| H                            | -6.985611  | 0.584545  | 4.489374  | H                            | -8.465775  | -3.362822 | 9.964055  |
| H                            | -5.809370  | -1.600754 | 4.685921  | H                            | -8.094550  | -1.512939 | 8.633691  |
| H                            | -10.764401 | -1.449871 | 4.183766  | H                            | -8.570263  | -3.622743 | 5.657401  |
| H                            | -9.578715  | -3.647742 | 4.386539  | H                            | -8.565694  | -6.094363 | 5.817302  |
| H                            | -6.901265  | -5.631824 | 2.901567  | H                            | -10.109897 | -2.267294 | 5.622536  |
| <b>E<sub>calcd</sub></b>     |            |           |           | <b>F<sub>calcd</sub></b>     |            |           |           |
| 64<br>scf done: -2168.466016 |            |           |           | 64<br>scf done: -2168.455706 |            |           |           |
| O                            | -12.778691 | -4.280353 | 6.096444  | C                            | -9.453314  | 2.214482  | 9.541503  |
| O                            | -11.142651 | -5.047128 | 4.219581  | C                            | -8.468193  | 1.180980  | 9.588390  |
| H                            | -10.991000 | -5.514675 | 5.060018  | C                            | -8.676384  | 0.133432  | 10.533548 |
| S                            | -12.392986 | -3.883079 | 4.654584  | C                            | -9.766914  | 0.132350  | 11.381919 |
| O                            | -13.414511 | -3.948037 | 3.510842  | C                            | -10.707486 | 1.164902  | 11.290075 |
| C                            | -11.532890 | -2.295742 | 4.643116  | C                            | -10.553553 | 2.212856  | 10.377449 |
| C                            | -10.899234 | -1.854027 | 5.806073  | N                            | -7.423381  | 1.084760  | 8.710256  |
| H                            | -10.993745 | -2.425082 | 6.723705  | C                            | -6.968932  | 2.152061  | 7.988878  |
| C                            | -10.186714 | -0.666574 | 5.786645  | C                            | -6.611206  | 1.835380  | 6.585237  |
| H                            | -9.737343  | -0.302338 | 6.700212  | C                            | -6.476973  | 2.907641  | 5.681280  |
| C                            | -11.466062 | -1.568292 | 3.450818  | C                            | -6.450586  | 4.230310  | 6.110584  |
| H                            | -11.978021 | -1.930002 | 2.565668  | C                            | -6.525303  | 4.552181  | 7.500055  |
| C                            | -10.753748 | -0.386364 | 3.432974  | C                            | -6.767074  | 3.480851  | 8.451334  |
| H                            | -10.694439 | 0.197094  | 2.518957  | C                            | -6.668673  | 3.777523  | 9.885070  |
| C                            | -10.076557 | 0.097788  | 4.591371  | C                            | -6.442449  | 5.207402  | 10.275117 |
| N                            | -9.419445  | 1.284877  | 4.469505  | C                            | -6.308251  | 6.232458  | 9.320596  |

|                          |            |           |           |    |            |           |           |
|--------------------------|------------|-----------|-----------|----|------------|-----------|-----------|
| H                        | -9.732110  | 1.934312  | 3.712094  | C  | -6.343862  | 5.913997  | 7.879875  |
| C                        | -8.580877  | 1.977209  | 5.356078  | C  | -6.125174  | 7.560003  | 9.742392  |
| C                        | -8.510686  | 3.401472  | 5.210419  | C  | -6.074650  | 7.865990  | 11.096649 |
| C                        | -9.212328  | 4.051552  | 4.133456  | C  | -6.207120  | 6.844995  | 12.050860 |
| O                        | -9.906301  | 3.451818  | 3.247815  | C  | -6.390195  | 5.529664  | 11.639941 |
| C                        | -9.114690  | 5.524827  | 4.028052  | N  | -6.581514  | 0.530390  | 6.269744  |
| C                        | -9.794665  | 6.189816  | 2.991246  | C  | -6.171461  | 0.052537  | 5.049005  |
| H                        | -10.370657 | 5.585608  | 2.298331  | C  | -6.857924  | -1.076551 | 4.522316  |
| C                        | -9.720582  | 7.571443  | 2.873598  | C  | -6.476973  | -1.666713 | 3.330891  |
| H                        | -10.250038 | 8.078755  | 2.069451  | C  | -5.384765  | -1.132936 | 2.637760  |
| C                        | -8.961643  | 8.313007  | 3.793508  | C  | -4.661850  | -0.041742 | 3.123679  |
| H                        | -8.902210  | 9.395812  | 3.702553  | C  | -5.061761  | 0.550335  | 4.311408  |
| C                        | -8.287215  | 7.661589  | 4.818890  | O  | -6.307796  | 5.200681  | 5.194826  |
| H                        | -7.688773  | 8.195010  | 5.550634  | O  | -6.732448  | 2.930431  | 10.790021 |
| C                        | -8.356190  | 6.266015  | 4.948081  | O  | -6.196445  | 6.865266  | 7.037522  |
| C                        | -7.607286  | 5.608736  | 6.072000  | S  | -4.797199  | -1.978894 | 1.146974  |
| O                        | -6.963827  | 6.340039  | 6.837738  | O  | -3.457589  | -2.954924 | 1.762228  |
| C                        | -7.697960  | 4.150782  | 6.159686  | S  | -12.094799 | 1.193675  | 12.434692 |
| C                        | -6.978353  | 3.475990  | 7.190760  | O  | -13.232360 | 2.086112  | 11.911794 |
| O                        | -6.315945  | 4.064318  | 8.109981  | Ti | -6.361306  | -0.969767 | 8.130941  |
| C                        | -6.958793  | 1.991979  | 7.196590  | O  | -4.862785  | 0.054721  | 8.589157  |
| C                        | -7.792060  | 1.305472  | 6.288382  | O  | -6.397082  | -1.855651 | 9.791405  |
| H                        | -7.797093  | 0.224260  | 6.302869  | O  | -5.487865  | -2.207579 | 7.055295  |
| N                        | -6.196154  | 1.450731  | 8.155077  | O  | -8.112802  | -1.490329 | 7.689847  |
| C                        | -5.846266  | 0.129823  | 8.191689  | O  | -5.869031  | -2.962770 | 0.643387  |
| C                        | -5.505383  | -0.641175 | 7.041225  | O  | -4.094161  | -1.021875 | 0.174878  |
| H                        | -5.525325  | -0.166881 | 6.066420  | O  | -12.402960 | -0.222008 | 12.983676 |
| C                        | -5.116498  | -1.967162 | 7.144661  | O  | -11.469463 | 2.020638  | 13.876339 |
| H                        | -4.844686  | -2.545817 | 6.268079  | H  | -6.250342  | 6.056592  | 5.740806  |
| C                        | -5.052325  | -2.548628 | 8.412054  | H  | -6.024317  | 8.322483  | 8.976858  |
| S                        | -4.632970  | -4.297469 | 8.551034  | H  | -5.933265  | 8.896055  | 11.417591 |
| O                        | -3.903482  | -4.795856 | 7.293791  | H  | -6.169997  | 7.083228  | 13.111640 |
| O                        | -4.084311  | -4.641218 | 9.956918  | H  | -6.501807  | 4.715477  | 12.348487 |
| O                        | -6.214508  | -5.097460 | 8.553964  | H  | -7.688220  | -1.465560 | 5.102403  |
| H                        | -6.159317  | -5.620561 | 9.372998  | H  | -7.012694  | -2.517370 | 2.922315  |
| C                        | -5.357510  | -1.830503 | 9.574623  | H  | -3.803768  | 0.330146  | 2.573020  |
| H                        | -5.275543  | -2.309572 | 10.544574 | H  | -4.497191  | 1.385010  | 4.709238  |
| C                        | -5.727885  | -0.503383 | 9.463381  | H  | -7.951345  | -0.674026 | 10.568710 |
| H                        | -5.918535  | 0.097757  | 10.342857 | H  | -9.914051  | -0.672901 | 12.094235 |
| O                        | -6.788246  | 3.147832  | 10.579313 | H  | -11.302404 | 2.995913  | 10.319997 |
| H                        | -7.573762  | 3.335714  | 10.053778 | H  | -9.341384  | 3.018345  | 8.823204  |
| H                        | -3.435118  | 1.654361  | 10.062400 | H  | -6.375931  | 2.724403  | 4.618641  |
| O                        | -4.253056  | 1.843632  | 10.542297 | H  | -3.804847  | -3.366101 | 2.573220  |
| Ti                       | -5.139413  | 3.221867  | 9.657429  | H  | -11.552599 | 1.314474  | 14.540691 |
| O                        | -3.799695  | 3.311819  | 8.331974  | H  | -5.551338  | -1.669639 | 10.221636 |
| H                        | -4.030921  | 3.927830  | 7.625605  | H  | -6.101975  | -2.912944 | 6.810736  |
| O                        | -4.620425  | 4.775888  | 10.548367 | H  | -8.749785  | -0.777257 | 7.568547  |
| H                        | -5.364533  | 5.000119  | 11.123937 | H  | -4.990410  | 0.907933  | 9.020652  |
| <b>G<sub>calcd</sub></b> |            |           |           |    |            |           |           |
| 65                       |            |           |           |    |            |           |           |
| scf done: -2169.106705   |            |           |           |    |            |           |           |
| C                        | -1.553192  | 5.255319  | 2.503674  |    |            |           |           |
| C                        | -2.858658  | 5.557260  | 2.063250  |    |            |           |           |
| C                        | -3.353759  | 6.868558  | 2.247171  |    |            |           |           |
| C                        | -2.577284  | 7.850780  | 2.839369  |    |            |           |           |
| C                        | -1.286901  | 7.521174  | 3.239533  |    |            |           |           |
| C                        | -0.763280  | 6.244644  | 3.083460  |    |            |           |           |
| N                        | -3.735363  | 4.650608  | 1.480238  |    |            |           |           |
| C                        | -3.583503  | 3.393936  | 0.919767  |    |            |           |           |
| C                        | -4.825488  | 2.788848  | 0.514663  |    |            |           |           |
| C                        | -4.837380  | 1.517114  | -0.058658 |    |            |           |           |
| C                        | -3.616169  | 0.788320  | -0.261653 |    |            |           |           |
| C                        | -2.385671  | 1.409279  | 0.109390  |    |            |           |           |
| C                        | -2.404758  | 2.710604  | 0.691969  |    |            |           |           |
| C                        | -6.135901  | 0.964646  | -0.436340 |    |            |           |           |

|    |           |           |           |
|----|-----------|-----------|-----------|
| C  | -6.175458 | -0.382425 | -1.029522 |
| C  | -4.981635 | -1.107709 | -1.210514 |
| C  | -3.653464 | -0.548579 | -0.818382 |
| C  | -7.404748 | -0.941713 | -1.410297 |
| C  | -7.447002 | -2.213529 | -1.969006 |
| C  | -6.260152 | -2.937384 | -2.149900 |
| C  | -5.037984 | -2.389463 | -1.773017 |
| N  | -1.210225 | 0.745984  | -0.069284 |
| C  | 0.099627  | 1.179870  | 0.263312  |
| C  | 0.905354  | 0.329754  | 1.035179  |
| C  | 2.206677  | 0.696928  | 1.375735  |
| C  | 2.679006  | 1.926828  | 0.930393  |
| C  | 1.914547  | 2.774896  | 0.140125  |
| C  | 0.618365  | 2.395706  | -0.207580 |
| S  | 4.366310  | 2.513734  | 1.446625  |
| O  | 4.798384  | 3.542610  | 0.375378  |
| O  | -5.939367 | 3.509529  | 0.717403  |
| O  | -2.636280 | -1.256869 | -0.987676 |
| O  | -7.199808 | 1.612610  | -0.265159 |
| S  | -0.263020 | 8.826150  | 4.009447  |
| O  | -0.989716 | 10.169171 | 3.877716  |
| O  | -0.353364 | 8.317595  | 5.679465  |
| O  | 1.215651  | 8.674029  | 3.621135  |
| O  | 4.190231  | 3.069404  | 2.901602  |
| O  | 5.253242  | 1.182515  | 1.431194  |
| Ti | 6.013024  | -0.071911 | 3.115816  |
| O  | 6.815820  | -1.304222 | 4.231891  |
| O  | 5.958782  | 1.398157  | 4.164419  |
| O  | 7.305914  | -0.325131 | 1.801291  |
| O  | 4.344074  | -0.924246 | 2.969674  |
| H  | -8.306028 | -0.358152 | -1.256751 |
| H  | -8.398572 | -2.646088 | -2.264333 |
| H  | -6.294056 | -3.931802 | -2.586246 |
| H  | -4.106570 | -2.929730 | -1.901323 |
| H  | 0.498603  | -0.617328 | 1.379261  |
| H  | 2.845659  | 0.042474  | 1.971620  |
| H  | 2.353712  | 3.701407  | -0.215737 |
| H  | 0.020773  | 3.022476  | -0.862364 |
| H  | -1.456693 | 3.154389  | 0.944869  |
| H  | -4.695158 | 4.968452  | 1.418935  |
| H  | -4.358491 | 7.108863  | 1.909961  |
| H  | -2.946032 | 8.860522  | 2.981105  |
| H  | 0.247152  | 6.016588  | 3.406443  |
| H  | -1.153407 | 4.254473  | 2.435225  |
| H  | 0.560307  | 8.428896  | 6.001271  |
| H  | -1.343937 | -0.218604 | -0.386731 |
| H  | -6.691774 | 2.925230  | 0.371266  |
| H  | 7.476340  | -1.832250 | 3.763891  |
| H  | 5.375068  | 2.135518  | 3.868427  |
| H  | 7.153652  | 0.294699  | 1.073185  |
| H  | 4.239926  | -1.610572 | 3.641393  |

**Table S2.** Sum of electronic and thermal energies, enthalpies, Gibbs free energies and solvation energies (Hartree/particle and kcal/mol), as well as the entropy (cal/molKelvin) and dipole (Debye) of the ground state structures of Ti dye complexes in gas phase. Relative total Gibbs free energies in solution ( $\Delta G_{\text{PCM}}$ ) were calculated using complex  $A_{\text{calcd}}$  as the reference structure for  $C_{\text{calcd}}$ ,  $E_{\text{calcd}}$  and  $G_{\text{calcd}}$ ; complex  $B_{\text{calcd}}$  for  $D_{\text{calcd}}$  and  $F_{\text{calcd}}$ .

| Complex            | Energies<br>E (Hartree<br>/particle) | Enthalpy<br>H (Hartree<br>/particle) | Free energy<br>G (Hartree<br>/particle) | PCM<br>$E_{\text{PCM}}$ (Hartree<br>/particle) | Entropy<br>S (cal/<br>/molKelvin) | Dipole<br>(Debye) |
|--------------------|--------------------------------------|--------------------------------------|-----------------------------------------|------------------------------------------------|-----------------------------------|-------------------|
| $A_{\text{calcd}}$ | -2168.600713                         | -2168.599769                         | -2168.725551                            | -3737.637904                                   | 264.73                            | 44.1504           |
| $B_{\text{calcd}}$ | <b>-2168.577697</b>                  | <b>-2168.576753</b>                  | <b>-2168.702763</b>                     | <b>-3737.622447</b>                            | <b>265.21</b>                     | <b>50.8715</b>    |
| $C_{\text{calcd}}$ | -2168.574764                         | -2168.57382                          | -2168.697416                            | -3737.610608                                   | 260.13                            | 51.5101           |
| $D_{\text{calcd}}$ | <b>-2168.572869</b>                  | <b>-2168.571925</b>                  | <b>-2168.696884</b>                     | <b>-3737.606677</b>                            | <b>262.998</b>                    | <b>60.5772</b>    |
| $E_{\text{calcd}}$ | -2167.992001                         | -2167.991057                         | -2168.113385                            | -3737.148356                                   | 257.46                            | 98.5545           |
| $F_{\text{calcd}}$ | <b>-2167.981164</b>                  | <b>-2167.98022</b>                   | <b>-2168.102566</b>                     | <b>-3737.129546</b>                            | <b>257.499</b>                    | <b>100.2309</b>   |
| $G_{\text{calcd}}$ | -2168.615454                         | -2168.61451                          | -2168.737457                            | -3737.668445                                   | 258.765                           | 31.1253           |

| Complex            | Gas Phase           |                     |                     | PCM (water)                    |                                | $\Delta G_{\text{PCM}}$<br>(kcal/mol) |
|--------------------|---------------------|---------------------|---------------------|--------------------------------|--------------------------------|---------------------------------------|
|                    | E (kcal/mol)        | H (kcal/mol)        | G(kcal/mol)         | $E_{\text{PCM}}$<br>(kcal/mol) | $G_{\text{PCM}}$<br>(kcal/mol) |                                       |
| $A_{\text{calcd}}$ | -1360817.549        | -1360816.957        | -1360895.886        | -2345403.292                   | -2345481.629                   | 0                                     |
| $B_{\text{calcd}}$ | <b>-1360803.106</b> | <b>-1360802.514</b> | <b>-1360881.586</b> | <b>-2345393.593</b>            | <b>-2345472.073</b>            | <b>0</b>                              |
| $C_{\text{calcd}}$ | -1360801.266        | -1360800.674        | -1360878.231        | -2345386.164                   | -2345463.129                   | 18.50032293                           |
| $D_{\text{calcd}}$ | <b>-1360800.077</b> | <b>-1360799.484</b> | <b>-1360877.897</b> | <b>-2345383.697</b>            | <b>-2345461.517</b>            | <b>10.5553122</b>                     |
| $E_{\text{calcd}}$ | -1360435.577        | -1360434.984        | -1360511.746        | -2345096.096                   | -2345172.266                   | 49.36328164*                          |
| $F_{\text{calcd}}$ | <b>-1360428.776</b> | <b>-1360428.184</b> | <b>-1360504.957</b> | <b>-2345084.293</b>            | <b>-2345160.474</b>            | <b>51.59908544*</b>                   |
| $G_{\text{calcd}}$ | -1360826.799        | -1360826.207        | -1360903.357        | -2345422.457                   | -2345499.015                   | -17.38562133                          |

\* The solvation free energy of  $H^+$  in water ( $\Delta G_{\text{sol}}(H^+) = -260$  kcal/mol) was added to the total free energies of complexes  $E_{\text{calcd}}$  and  $F_{\text{calcd}}$  in water.
